# Supplementary material
Source: publisher figshare collection journal article supplement (https://gsapubs.figshare.com/ndownloader/files/39621064)
Supplement: Supplementary file 1 [file 39621064]

## Sheet: I1S1
Sample Nr:	I1S1	Injectite 1		Size thinsection:		27 mm x 46 mm
	Counts per size
Grain/mineral	< 0,1 mm	0,1 - 0,5 mm	0,5 - 1 mm	> 1 mm	Total	Total %	Rel. %
Quartz	38	56	25	4	123	80.3922	72.8933
Oxide	1	3	1		5	3.26797	2.87921
Plagioclase					0	0	0
K-Feldspar		1	1		2	1.30719	1.75562
Mica		8			8	5.22876	3.93258
Zircon		1			1	0.653595	0.491573
Red clay/Rutile				1	1	0.653595	2.10674
Amphibole		1			1	0.653595	0.491573
Glauconite			1		1	0.653595	1.26404
Chalcedony		3	2		5	3.26797	4.00281
					0	0	0
Lithic grain		1	1	3	5	3.26797	8.07584
Shell fossils					0	0	0
Wood fossils				1	1	0.653595	2.10674
Total	39	74	31	9	153	100	100
Total size %	25.4902	48.366	20.2614	5.88235	100
Total mm2	3.9	25.9	27.9	13.5	71.2
Relative total size %	5.47753	36.3764	39.1854	18.9607
Matrix %	12.5
	Undulouse	Broken	Normal
Quartz extinction	50 - 60%	10 - 15%	about 30%
Sphericity/roundness		8	4	42	58	30
	0.9			8	24	13	45		Average roundness	0.638028
	0.7		4	21	21	11	57		Average sphericity	0.684507
Sphericity	0.5			9	11	4	24
	0.3	8		4	2	2	16
		0.1	0.3	0.5	0.7	0.9
			Roundness
	Total	142
	0.9	0	0	0.056338	0.169014	0.0915493		Notes:	Mica's give the 5,63% of low roundness and sphericity
	0.7	0	0.028169	0.147887	0.147887	0.0774648
	0.5	0	0	0.0633803	0.0774648	0.028169
	0.3	0.056338	0	0.028169	0.0140845	0.0140845
		0.1	0.3	0.5	0.7	0.9

## Sheet: I1S2
Sample Nr:	I1S2	Injectite 1		Size thinsection:		27 mm x 46 mm
	Counts per size
Grain/mineral	< 0,1 mm	0,1 - 0,5 mm	0,5 - 1 mm	> 1 mm	Total	Total %	Rel. %
Quartz	70	85	36	9	200	85.4701	81.2684
Oxide	4	10			14	5.98291	3.83481
Plagioclase	1	1			2	0.854701	0.442478
K-Feldspar			1		1	0.42735	0.884956
Mica		5	3	1	9	3.84615	5.85054
Zircon		1			1	0.42735	0.344149
Red clay/Rutile					0	0	0
Amphibole					0	0	0
Glauconite					0	0	0
Chalcedony			4	1	5	2.13675	5.01475
					0	0	0
Lithic grain				1	1	0.42735	1.47493
Shell fossils			1		1	0.42735	0.884956
Wood fossils					0	0	0
Total	75	102	45	12	234	100	100
Total size %	32.0513	43.5897	19.2308	5.12821	100
Total mm2	7.5	35.7	40.5	18	101.7
Relative total size %	7.37463	35.1032	39.823	17.6991
Matrix %	12.5
	Undulouse	Broken	Normal
Quartz extinction	0.7	0.1	0.2
Sphericity/roundness		12	17	78	70	55
	0.9			22	36	26	84		Average roundness	0.619828
	0.7		12	35	20	25	92		Average sphericity	0.70431
Sphericity	0.5	3	1	20	7	2	33
	0.3	9	4	1	7	2	23
		0.1	0.3	0.5	0.7	0.9
			Roundness
	Total	232
	0.9	0	0	0.0948276	0.155172	0.112069		Notes:	Mica's give the 3,88% of low roundness and sphericity
	0.7	0	0.0517241	0.150862	0.0862069	0.107759
	0.5	0.012931	0.00431034	0.0862069	0.0301724	0.00862069
	0.3	0.0387931	0.0172414	0.00431034	0.0301724	0.00862069
		0.1	0.3	0.5	0.7	0.9

## Sheet: I1S3
Sample Nr:	I1S3	Injectite 1		Size thinsection:		27 mm x 46 mm
	Counts per size
Grain/mineral	< 0,1 mm	0,1 - 0,5 mm	0,5 - 1 mm	> 1 mm	Total	Total %	Rel. %
Quartz	80	95	43	9	227	83.1502	77.7131
Oxide		6	3		9	3.2967	3.99168
Plagioclase	1	2	1		4	1.4652	1.41372
K-Feldspar	1	2	2	1	6	2.1978	3.40956
Mica		4	5	1	10	3.663	6.15385
Zircon	2				2	0.732601	0.16632
Red clay/Rutile					0	0	0
Amphibole					0	0	0
Glauconite					0	0	0
Chalcedony		8	3	1	12	4.3956	5.82121
					0	0	0
Lithic grain		2	1		3	1.0989	1.33056
Shell fossils					0	0	0
Wood fossils					0	0	0
Total	84	119	58	12	273	100	100
Total size %	30.7692	43.5897	21.2454	4.3956	100
Total mm2	8.4	41.65	52.2	18	120.25
Relative total size %	6.98545	34.6362	43.4096	14.9688
Matrix %	10
	Undulouse	Broken	Normal
Quartz extinction	50 - 70%	0.1	0.4
Sphericity/roundness		17	20	49	61	36
	0.9	1	2	10	31	11	55		Average roundness	0.586339
	0.7	2	6	20	18	13	59		Average sphericity	0.657377
Sphericity	0.5	3	6	11	12	12	44
	0.3	11	6	8			25
		0.1	0.3	0.5	0.7	0.9
			Roundness
	Total	183
	0.9	0.00546448	0.010929	0.0546448	0.169399	0.0601093		Notes:	Mica's give the 6,01% of low roundness and sphericity Some oxides are smeared
	0.7	0.010929	0.0327869	0.10929	0.0983607	0.0710383
	0.5	0.0163934	0.0327869	0.0601093	0.0655738	0.0655738
	0.3	0.0601093	0.0327869	0.0437158	0	0
		0.1	0.3	0.5	0.7	0.9

## Sheet: I1S4
Sample Nr:	I1S4	Injectite 1		Size thinsection:		27 mm x 46 mm
	Counts per size		UNCONSOLIDATED SAND
Grain/mineral	< 0,1 mm	0,1 - 0,5 mm	0,5 - 1 mm	> 1 mm	Total	Total %	Rel. %
Quartz	15	102	20	5	142	78.8889	74.7764
Oxide	1	4	2	1	8	4.44444	5.72451
Plagioclase		2	1		3	1.66667	1.90817
K-Feldspar		1			1	0.555556	0.417412
Mica	3	8	3		14	7.77778	6.91711
Zircon	2				2	1.11111	0.238521
Red clay/Rutile	1				1	0.555556	0.119261
Amphibole					0	0	0
Glauconite					0	0	0
Chalcedony		2	1		3	1.66667	1.90817
					0	0	0
Lithic grain		2		4	6	3.33333	7.99046
Shell fossils					0	0	0
Wood fossils					0	0	0
Total	22	121	27	10	180	100	100
Total size %	12.2222	67.2222	15	5.55556	100
Total mm2	2.2	42.35	24.3	15	83.85
Relative total size %	2.62373	50.5069	28.9803	17.8891
Matrix %	0
	Undulouse	Broken	Normal
Quartz extinction	70 - 80%	0.05	0.25
Sphericity/roundness		14	9	54	62	33
	0.9			17	32	14	63		Average roundness	0.605814
	0.7		6	15	18	9	48		Average sphericity	0.676744
Sphericity	0.5		3	15	11	10	39
	0.3	14		7	1		22
		0.1	0.3	0.5	0.7	0.9
			Roundness
	Total	172
	0.9	0	0	0.0988372	0.186047	0.0813953		Notes:	Mica's give the 8,14% of low roundness and sphericity There is some cement between the grains forming grains
	0.7	0	0.0348837	0.0872093	0.104651	0.0523256
	0.5	0	0.0174419	0.0872093	0.0639535	0.0581395
	0.3	0.0813953	0	0.0406977	0.00581395	0
		0.1	0.3	0.5	0.7	0.9

## Sheet: I1S5
Sample Nr:	I1S5	Injectite 1		Size thinsection:		27 mm x 46 mm
	Counts per size
Grain/mineral	< 0,1 mm	0,1 - 0,5 mm	0,5 - 1 mm	> 1 mm	Total	Total %	Rel. %
Quartz	37	98	41	7	183	79.5652	77.0063
Oxide	2	3	4	1	10	4.34783	5.72588
Plagioclase		5			5	2.17391	1.578
K-Feldspar		2			2	0.869565	0.631199
Mica	2	8	1		11	4.78261	3.51668
Zircon		1			1	0.434783	0.3156
Red clay/Rutile					0	0	0
Amphibole					0	0	0
Glauconite		1			1	0.434783	0.3156
Chalcedony		4	4		8	3.47826	4.50857
					0	0	0
Lithic grain		4	3	2	9	3.91304	6.40216
Shell fossils					0	0	0
Wood fossils					0	0	0
Total	41	126	53	10	230	100	100
Total size %	17.8261	54.7826	23.0435	4.34783	100
Total mm2	4.1	44.1	47.7	15	110.9
Relative total size %	3.69702	39.7656	43.0117	13.5257
Matrix %	10
	Undulouse	Broken	Normal
Quartz extinction	0.5	0.15	0.05
Sphericity/roundness		11	9	83	49	19
	0.9		2	22	26	9	59		Average roundness	0.565497
	0.7		5	27	18	7	57		Average sphericity	0.677778
Sphericity	0.5		2	24	3	3	32
	0.3	11		10	2		23
		0.1	0.3	0.5	0.7	0.9
			Roundness
	Total	171
	0.9	0	0.0116959	0.128655	0.152047	0.0526316		Notes:	Mica's give the 6,43% of low roundness and sphericity
	0.7	0	0.0292398	0.157895	0.105263	0.0409357
	0.5	0	0.0116959	0.140351	0.0175439	0.0175439
	0.3	0.0643275	0	0.0584795	0.0116959	0
		0.1	0.3	0.5	0.7	0.9

## Sheet: I1S6
Sample Nr:	I1S6	Injectite 1		Size thinsection:		27 mm x 46 mm
	Counts per size
Grain/mineral	< 0,1 mm	0,1 - 0,5 mm	0,5 - 1 mm	> 1 mm	Total	Total %	Rel. %
Quartz	42	90	23	8	163	71.8062	69.3712
Oxide		16	1		17	7.48899	6.59229
Plagioclase		2			2	0.881057	0.709939
K-Feldspar		4	1		5	2.20264	2.33266
Mica		13	1		14	6.1674	5.52738
Zircon		3			3	1.32159	1.06491
Red clay/Rutile					0	0	0
Amphibole					0	0	0
Glauconite					0	0	0
Chalcedony		7	4	1	12	5.28634	7.6572
					0	0	0
Lithic grain		7	3	1	11	4.84581	6.74442
Shell fossils					0	0	0
Wood fossils					0	0	0
Total	42	142	33	10	227	100	100
Total size %	18.5022	62.5551	14.5374	4.40529	100
Total mm2	4.2	49.7	29.7	15	98.6
Relative total size %	4.25963	50.4057	30.1217	15.213
Matrix %	10
	Undulouse	Broken	Normal
Quartz extinction	0.7	5 - 10%	0.25
Sphericity/roundness		8	2	65	50	42
	0.9		2	20	30	18	70		Average roundness	0.638922
	0.7			19	13	19	51		Average sphericity	0.696407
Sphericity	0.5			12	5	2	19
	0.3	8		14	2	3	27
		0.1	0.3	0.5	0.7	0.9
			Roundness
	Total	167
	0.9	0	0.011976	0.11976	0.179641	0.107784		Notes:	Mica's give the 4,79% of low roundness and sphericity
	0.7	0	0	0.113772	0.0778443	0.113772
	0.5	0	0	0.0718563	0.0299401	0.011976
	0.3	0.0479042	0	0.0838323	0.011976	0.0179641
		0.1	0.3	0.5	0.7	0.9

## Sheet: I1S8
Sample Nr:	I1S8	Injectite 1		Size thinsection:		27 mm x 46 mm
	Counts per size
Grain/mineral	< 0,1 mm	0,1 - 0,5 mm	0,5 - 1 mm	> 1 mm	Total	Total %	Rel. %
Quartz	40	80	23	6	149	73.7624	69.1704
Oxide		15	5	1	21	10.396	12.6121
Plagioclase		3			3	1.48515	1.17713
K-Feldspar		1			1	0.49505	0.392377
Mica		9	1		10	4.9505	4.54036
Zircon		2			2	0.990099	0.784753
Red clay/Rutile					0	0	0
Amphibole					0	0	0
Glauconite					0	0	0
Chalcedony		6	2		8	3.9604	4.3722
					0	0	0
Lithic grain		4	2	1	7	3.46535	5.26906
Shell fossils					0	0	0
Wood fossils				1	1	0.49505	1.68161
Total	40	120	33	9	202	100	100
Total size %	19.802	59.4059	16.3366	4.45545	100
Total mm2	4	42	29.7	13.5	89.2
Relative total size %	4.4843	47.0852	33.296	15.1345
Matrix %	10
	Undulouse	Broken	Normal
Quartz extinction	0.7	0.1	0.2
Sphericity/roundness		3	6	57	53	37
	0.9		2	26	20	15	63		Average roundness	0.647436
	0.7			17	17	13	47		Average sphericity	0.701282
Sphericity	0.5		4	9	10	7	30
	0.3	3		5	6	2	16
		0.1	0.3	0.5	0.7	0.9
			Roundness
	Total	156
	0.9	0	0.0128205	0.166667	0.128205	0.0961538		Notes:	FYI: Sample number I1S7 does not excist Mica's give the 1,92% of low roundness and sphericity
	0.7	0	0	0.108974	0.108974	0.0833333
	0.5	0	0.025641	0.0576923	0.0641026	0.0448718
	0.3	0.0192308	0	0.0320513	0.0384615	0.0128205
		0.1	0.3	0.5	0.7	0.9

## Sheet: I2S1
Sample Nr:	I2S1	Injectite 2		Size thinsection:		27 mm x 46 mm
	Counts per size
Grain/mineral	< 0,1 mm	0,1 - 0,5 mm	0,5 - 1 mm	> 1 mm	Total	Total %	Rel. %
Quartz	30	70	19	13	132	69.4737	65.8449
Oxide		12	3	1	16	8.42105	8.62866
Plagioclase		3		1	4	2.10526	2.61941
K-Feldspar		4	1		5	2.63158	2.36261
Mica		8	2	1	11	5.78947	6.26605
Zircon		4			4	2.10526	1.43811
Red clay/Rutile					0	0	0
Amphibole					0	0	0
Glauconite					0	0	0
Chalcedony		7	3		10	5.26316	5.29019
					0	0	0
Lithic grain		3	2	3	8	4.21053	7.55008
Shell fossils					0	0	0
Wood fossils					0	0	0
Total	30	111	30	19	190	100	100
Total size %	15.7895	58.4211	15.7895	10	100
Total mm2	3	38.85	27	28.5	97.35
Relative total size %	3.08166	39.9076	27.735	29.2758
Matrix %	10
	Undulouse	Broken	Normal
Quartz extinction	50 - 60%	0.1	0.3
Sphericity/roundness		5	5	42	54	32
	0.9		2	17	22	12	53		Average roundness	0.649275
	0.7			12	20	12	44		Average sphericity	0.688406
Sphericity	0.5		2	7	6	6	21
	0.3	5	1	6	6	2	20
		0.1	0.3	0.5	0.7	0.9
			Roundness
	Total	138
	0.9	0	0.0144928	0.123188	0.15942	0.0869565		Notes:	Mica's give the 3,62% of low roundness and sphericity
	0.7	0	0	0.0869565	0.144928	0.0869565
	0.5	0	0.0144928	0.0507246	0.0434783	0.0434783
	0.3	0.0362319	0.00724638	0.0434783	0.0434783	0.0144928
		0.1	0.3	0.5	0.7	0.9

## Sheet: I2S2
Sample Nr:	I2S2	Injectite 2		Size thinsection:		27 mm x 46 mm
	Counts per size
Grain/mineral	< 0,1 mm	0,1 - 0,5 mm	0,5 - 1 mm	> 1 mm	Total	Total %	Rel. %
Quartz	42	85	27	9	163	75.1152	73.7031
Oxide		11	1	1	13	5.99078	6.42013
Plagioclase		5	2		7	3.22581	3.64664
K-Feldspar		2	1		3	1.38249	1.64355
Mica		8			8	3.68664	2.87622
Zircon	1	1			2	0.921659	0.46225
Red clay/Rutile					0	0	0
Amphibole					0	0	0
Glauconite	1	1			2	0.921659	0.46225
Chalcedony		5	2		7	3.22581	3.64664
					0	0	0
Lithic grain		7	5		12	5.52995	7.13919
Shell fossils					0	0	0
Wood fossils					0	0	0
Total	44	125	38	10	217	100	100
Total size %	20.2765	57.6037	17.5115	4.60829	100
Total mm2	4.4	43.75	34.2	15	97.35
Relative total size %	4.51977	44.9409	35.131	15.4083
Matrix %	12.5
	Undulouse	Broken	Normal
Quartz extinction	60 - 70%	0.05	0.25
Sphericity/roundness		5	7	38	33	16
	0.9		2	13	15	5	35		Average roundness	0.59697
	0.7		2	12	10	7	31		Average sphericity	0.671717
Sphericity	0.5		3	7	5	2	17
	0.3	5		6	3	2	16
		0.1	0.3	0.5	0.7	0.9
			Roundness
	Total	99
	0.9	0	0.020202	0.131313	0.151515	0.0505051		Notes:	Mica's give the 5,05% of low roundness and sphericity
	0.7	0	0.020202	0.121212	0.10101	0.0707071
	0.5	0	0.030303	0.0707071	0.0505051	0.020202
	0.3	0.0505051	0	0.0606061	0.030303	0.020202
		0.1	0.3	0.5	0.7	0.9

## Sheet: I2S3
Sample Nr:	I2S3	Injectite 2		Size thinsection:		27 mm x 46 mm
	Counts per size
Grain/mineral	< 0,1 mm	0,1 - 0,5 mm	0,5 - 1 mm	> 1 mm	Total	Total %	Rel. %
Quartz	27	72	18	9	126	74.5562	73.5632
Oxide		14		1	15	8.87574	8.17369
Plagioclase		2		1	3	1.77515	2.80971
K-Feldspar		1			1	0.591716	0.446999
Mica		8	1		9	5.32544	4.72542
Zircon		2			2	1.18343	0.893997
Red clay/Rutile					0	0	0
Amphibole					0	0	0
Glauconite					0	0	0
Chalcedony		4	3		7	4.14201	5.23627
					0	0	0
Lithic grain		5		1	6	3.5503	4.1507
Shell fossils					0	0	0
Wood fossils					0	0	0
Total	27	108	22	12	169	100	100
Total size %	15.9763	63.9053	13.0178	7.10059	100
Total mm2	2.7	37.8	19.8	18	78.3
Relative total size %	3.44828	48.2759	25.2874	22.9885
Matrix %	15
	Undulouse	Broken	Normal
Quartz extinction	60 - 70%	5 - 10%	about 20%
Sphericity/roundness		3	0	31	34	20
	0.9			12	15	7	34		Average roundness	0.654545
	0.7			10	7	10	27		Average sphericity	0.690909
Sphericity	0.5			6	7	3	16
	0.3	3		3	5		11
		0.1	0.3	0.5	0.7	0.9
			Roundness
	Total	88
	0.9	0	0	0.136364	0.170455	0.0795455		Notes:	Mica's give the 3,41% of low roundness and sphericity
	0.7	0	0	0.113636	0.0795455	0.113636
	0.5	0	0	0.0681818	0.0795455	0.0340909
	0.3	0.0340909	0	0.0340909	0.0568182	0
		0.1	0.3	0.5	0.7	0.9

[truncated: 14 more sheets: I3S1-1 (I), I3S1-1 (M), I3S1-1 (H), I4S1, I5S1(I), I5S1(C), I6S1-1, I6S1-2, I7S1, I7S2, M6, M13, F6, F8]
